# Supplementary material for: Differences in age-specific mortality between wild-caught and captive-born Asian elephants
Source: PubMed Central journal article supplement (PMC6081384; doi:10.1038/s41467-018-05515-8), 2018-08-07
Supplement: 41467_2018_5515_MOESM1_ESM.pdf [file 41467_2018_5515_MOESM1_ESM.pdf]

# **Differences in age-specific mortality between wild-caught and captive-born Asian elephants**

Lahdenperä et al.

Supplementary Table 1. Model averaged estimates and 95% confidence intervals for all parameters. Columns provide, from left to right, the names of the parameters, the model averaged estimate, the model averaged standard error, the lower boundary of the 95% CI based on the model averaged standard error, and the corresponding upper boundary. The last column visually indicates cases for which the model averaged lower boundary of the 95% is larger than 1e-5.

| <b>Parameter</b>    | <b>Mean</b> | <b>SE</b> | <b>Lwr</b> | <b>Upr</b> |   |
|---------------------|-------------|-----------|------------|------------|---|
| w1.females          | 0.0807      | 0.00549   | 0.06994    | 0.09145    | * |
| w1.males            | 0.10465     | 0.00655   | 0.09182    | 0.11748    | * |
| b1.females          | 0.34585     | 0.03136   | 0.28439    | 0.40731    | * |
| b1.males            | 0.30425     | 0.02251   | 0.26013    | 0.34836    | * |
| w2.females          | 0.00101     | 0.00031   | 0.00041    | 0.0016     | * |
| w2.males            | 0.0027      | 0.0006    | 0.00152    | 0.00388    | * |
| b2.females          | 0.07656     | 0.00717   | 0.0625     | 0.09062    | * |
| b2.males            | 0.06513     | 0.00564   | 0.05408    | 0.07618    | * |
| w3.females          | 0           | 0         | 0          | 0          |   |
| w3.males            | 0           | 0         | 0          | 0          |   |
| w3.2000             | 0.00426     | 0.00156   | 0.0012     | 0.00731    | * |
| w3.1940             | 0.00332     | 0.00334   | -0.0032    | 0.00987    |   |
| w3.1960             | 8.3E-89     | 1.9E-20   | -4E-20     | 3.7E-20    |   |
| w3.1980             | 0.00211     | 0.00099   | 0.00017    | 0.00404    | * |
| w3.Unknown          | 0.00834     | 0.00266   | 0.00313    | 0.01355    | * |
| w3.Ayeyarwa         | 1.3E-42     | 0.00158   | -0.0031    | 0.00309    |   |
| w3.Bago             | 7.9E-43     | 0.00049   | -0.001     | 0.00097    |   |
| w3.Kachin           | 0.00231     | 0.00168   | -0.001     | 0.00561    |   |
| w3.Magway           | 1.6E-89     | 0.00056   | -0.0011    | 0.00109    |   |
| w3.Mandalay         | 0.00682     | 0.00164   | 0.0036     | 0.01004    | * |
| w3.Rakhine          | 2.7E-45     | 0.00022   | -0.0004    | 0.00043    |   |
| w3.Sagaing          | 0.00147     | 0.00111   | -0.0007    | 0.00364    |   |
| w3.Shan             | 0.00617     | 0.00208   | 0.0021     | 0.01024    | * |
| w3.Tanintha         | 0.00354     | 0.00469   | -0.0057    | 0.01274    |   |
| w4.females_IMM      | 0.02209     | 0.01318   | -0.0037    | 0.04792    |   |
| w4.males_IMM        | 0.02238     | 0.01386   | -0.0048    | 0.04955    |   |
| w4.females_MILARSHI | 0.03286     | 0.02038   | -0.0071    | 0.07281    |   |
| w4.males_MILARSHI   | 0.03316     | 0.02068   | -0.0074    | 0.07368    |   |
| w4.females_STOCKADE | 0.02268     | 0.01121   | 0.00072    | 0.04464    | * |
| w4.males_STOCKADE   | 0.02298     | 0.01198   | -0.0005    | 0.04646    |   |
| w5.females_IMM      | 0.0011      | 0.0007    | -0.0003    | 0.00247    |   |
| w5.males_IMM        | 0.00112     | 0.00072   | -0.0003    | 0.00253    |   |
| w5.females_MILARSHI | 0.00085     | 0.00088   | -0.0009    | 0.00258    |   |
| w5.males_MILARSHI   | 0.00088     | 0.00091   | -0.0009    | 0.00265    |   |
| w5.females_STOCKADE | 0.00076     | 0.00052   | -0.0003    | 0.00177    |   |
| w5.males_STOCKADE   | 0.00078     | 0.00056   | -0.0003    | 0.00188    |   |
| b4.females_IMM      | 0.34127     | 0.12858   | 0.08926    | 0.59328    | * |
| b4.males_IMM        | 0.3413      | 0.16103   | 0.02568    | 0.65693    | * |
| b4.females_MILARSHI | 0.55583     | 0.47577   | -0.3766    | 1.48832    |   |
| b4.males_MILARSHI   | 0.55587     | 0.48553   | -0.3958    | 1.50749    |   |
| b4.females_STOCKADE | 0.33394     | 0.24201   | -0.1404    | 0.80828    |   |
| b4.males_STOCKADE   | 0.33398     | 0.26071   | -0.177     | 0.84496    |   |
| b5.females_IMM      | 0.00622     | 0.04857   | -0.089     | 0.10142    |   |
| b5.males_IMM        | 0.00613     | 0.05043   | -0.0927    | 0.10497    |   |
| b5.females_MILARSHI | 0.0059      | 0.0486    | -0.0894    | 0.10115    |   |
| b5.males_MILARSHI   | 0.00581     | 0.05045   | -0.0931    | 0.10469    |   |
| b5.females_STOCKADE | 0.006       | 0.04979   | -0.0916    | 0.10358    |   |
| b5.males_STOCKADE   | 0.00591     | 0.0516    | -0.0952    | 0.10704    |   |

Supplementary Table 2. Estimates for all 17 model fits and for the model averaging. The first column provides the names of the parameters. The rest of the table provides the estimated parameter values for all parameters and for all fitted models. Parameters have been labeled according to the model definition provided in methods. Estimates at zero can either correspond to model constraints or to parameter estimated at such values (see Table 1).

| Parameter           | mod1    | mod2    | mod3    | mod4    | mod5     | mod6    | mod7    | mod8     | mod9    | mod10   | mod11   | mod12   | mod13    | mod14   | mod15   | mod16   | mod17   |
|---------------------|---------|---------|---------|---------|----------|---------|---------|----------|---------|---------|---------|---------|----------|---------|---------|---------|---------|
| w1.females          | 0.08067 | 0.08067 | 0.0809  | 0.0809  | 0.08051  | 0.08051 | 0.08082 | 0.08082  | 0.0807  | 0.0807  | 0.08089 | 0.08089 | 0.07752  | 0.08862 | 0.08486 | 0       | 0       |
| w1.males            | 0.10471 | 0.10471 | 0.10484 | 0.10484 | 0.10492  | 0.10492 | 0.10469 | 0.10469  | 0.10458 | 0.10458 | 0.10465 | 0.10464 | 0.10196  | 0.08862 | 0.08486 | 0       | 0       |
| b1.females          | 0.34394 | 0.34393 | 0.35055 | 0.35055 | 0.34376  | 0.34376 | 0.35098 | 0.35098  | 0.34607 | 0.34607 | 0.35189 | 0.35189 | 0.29826  | 0.29176 | 0.37906 | 0       | 0       |
| b1.males            | 0.30314 | 0.30314 | 0.30857 | 0.30857 | 0.30571  | 0.30571 | 0.31049 | 0.31049  | 0.30379 | 0.30379 | 0.30862 | 0.30862 | 0.27256  | 0.29176 | 0.37906 | 0       | 0       |
| w2.females          | 0.00095 | 0.00095 | 0.0011  | 0.0011  | 0.00103  | 0.00103 | 0.00117 | 0.00117  | 0.00101 | 0.00101 | 0.00116 | 0.00116 | 0.002    | 0.00257 | 0       | 0.0053  | 0       |
| w2.males            | 0.00261 | 0.00261 | 0.0028  | 0.0028  | 0.00258  | 0.00258 | 0.00293 | 0.00293  | 0.00273 | 0.00273 | 0.00292 | 0.00292 | 0.00385  | 0.00257 | 0       | 0.0053  | 0       |
| b2.females          | 0.07733 | 0.07733 | 0.07478 | 0.07478 | 0.07624  | 0.07624 | 0.07375 | 0.07375  | 0.07661 | 0.07661 | 0.07392 | 0.07392 | 0.06069  | 0.0576  | 0       | 0       | 0       |
| b2.males            | 0.06561 | 0.06561 | 0.06454 | 0.06454 | 0.06605  | 0.06605 | 0.06368 | 0.06368  | 0.06496 | 0.06496 | 0.06376 | 0.06376 | 0.05614  | 0.0576  | 0       | 0       | 0       |
| w3.females          | 0       | 0       | 0       | 0       | 0        | 0       | 0       | 0        | 0       | 0       | 0       | 0       | 0        | 0       | 0       | 0       | 0       |
| w3.males            | 0       | 0       | 0       | 0       | 0        | 0       | 0       | 0        | 0       | 0       | 0       | 0       | 0        | 0       | 0       | 0       | 0       |
| w3.2000             | 0.00415 | 0.00415 | 0.00417 | 0.00417 | 0.00433  | 0.00433 | 0.00434 | 0.00434  | 0.00432 | 0.00432 | 0.00432 | 0.00432 | 0.0009   | 0.00197 | 0.00737 | 0.02688 | 0.0292  |
| w3.1940             | 0.00358 | 0.00358 | 0.0056  | 0.0056  | 0.00284  | 0.00284 | 0.00538 | 0.00538  | 0.00277 | 0.00277 | 0.00522 | 0.00522 | 0.01236  | 0.01064 | 0.03445 | 0.02798 | 0.0303  |
| w3.1960             | 0       | 0       | 0       | 0       | 0        | 0       | 0       | 0        | 0       | 0       | 0       | 0       | 0        | 0       | 0.01139 | 0.00611 | 0.00843 |
| w3.1980             | 0.00198 | 0.00198 | 0.0018  | 0.0018  | 0.00223  | 0.00223 | 0.00197 | 0.00197  | 0.00222 | 0.00222 | 0.00198 | 0.00198 | 0.00077  | 0.00146 | 0.00741 | 0.00989 | 0.01221 |
| w3.Unknown          | 0.00853 | 0.00853 | 0.00816 | 0.00816 | 0.00839  | 0.00839 | 0.00797 | 0.00797  | 0.00828 | 0.00828 | 0.00795 | 0.00795 | 0.00942  | 0.01185 | 0.01438 | 0.01762 | 0.0206  |
| w3.Ayeyarwa         | 0       | 0       | 0       | 0       | 0        | 0       | 0       | 0        | 0       | 0       | 0       | 0       | 0.00302  | 0.00399 | 0.00846 | 0.00211 | 0.00508 |
| w3.Bago             | 0       | 0       | 0       | 0       | 0        | 0       | 0       | 0        | 0       | 0       | 0       | 0       | 0.00183  | 0.00241 | 0.00825 | 0.00709 | 0.01007 |
| w3.Kachin           | 0.00286 | 0.00286 | 0.00274 | 0.00274 | 0.00203  | 0.00203 | 0.00193 | 0.00193  | 0.00201 | 0.00201 | 0.00193 | 0.00193 | 0.00561  | 0.00602 | 0.01052 | 0.01046 | 0.01344 |
| w3.Magway           | 0       | 0       | 0       | 0       | 0        | 0       | 0       | 0        | 0       | 0       | 0       | 0       | 0        | 0       | 0.00213 | 0.00417 | 0.00715 |
| w3.Mandalay         | 0.00682 | 0.00682 | 0.0068  | 0.0068  | 0.00685  | 0.00685 | 0.00681 | 0.00681  | 0.00682 | 0.00682 | 0.0068  | 0.0068  | 0.00771  | 0.00787 | 0.01209 | 0.01634 | 0.01932 |
| w3.Rakhine          | 0       | 0       | 0       | 0       | 0        | 0       | 0       | 0        | 0       | 0       | 0       | 0       | 6.31E-06 | 0.00021 | 0.00434 | 0.00165 | 0.00463 |
| w3.Sagaing          | 0.00162 | 0.00162 | 0.00147 | 0.00147 | 0.00141  | 0.00141 | 0.00131 | 0.00131  | 0.0014  | 0.0014  | 0.0013  | 0.0013  | 0.00241  | 0.00259 | 0.00636 | 0.00616 | 0.00914 |
| w3.Shan             | 0.00631 | 0.00631 | 0.0061  | 0.0061  | 0.00615  | 0.00615 | 0.00601 | 0.00601  | 0.00612 | 0.00612 | 0.00602 | 0.00602 | 0.00933  | 0.00959 | 0.0146  | 0.01732 | 0.0203  |
| w3.Tanintha         | 0.00376 | 0.00376 | 0.00404 | 0.00404 | 0.0034   | 0.0034  | 0.00382 | 0.00382  | 0.00334 | 0.00334 | 0.00375 | 0.00375 | 0.00942  | 0.00902 | 0.013   | 0.01323 | 0.01621 |
| w4.females_IMM      | 0.01552 | 0.01551 | 0.04325 | 0.04325 | 0.01909  | 0.01909 | 0.03598 | 0.03598  | 0.02243 | 0.02243 | 0.0383  | 0.0383  | 0        | 0       | 0       | 0       | 0       |
| w4.males_IMM        | 0.01552 | 0.01551 | 0.04325 | 0.04325 | 0.0233   | 0.02329 | 0.04367 | 0.04367  | 0.02243 | 0.02243 | 0.0383  | 0.0383  | 0        | 0       | 0       | 0       | 0       |
| w4.females_MILARSHI | 0.04737 | 0.04736 | 0.05886 | 0.05886 | 0.01909  | 0.01909 | 0.03598 | 0.03598  | 0.02243 | 0.02243 | 0.0383  | 0.0383  | 0        | 0       | 0       | 0       | 0       |
| w4.males_MILARSHI   | 0.04737 | 0.04736 | 0.05886 | 0.05886 | 0.0233   | 0.02329 | 0.04367 | 0.04367  | 0.02243 | 0.02243 | 0.0383  | 0.0383  | 0        | 0       | 0       | 0       | 0       |
| w4.females_STOCKADE | 0.01939 | 0.01939 | 0.03079 | 0.03079 | 0.01909  | 0.01909 | 0.03598 | 0.03598  | 0.02243 | 0.02243 | 0.0383  | 0.0383  | 0        | 0       | 0       | 0       | 0       |
| w4.males_STOCKADE   | 0.01939 | 0.01939 | 0.03079 | 0.03079 | 0.0233   | 0.02329 | 0.04367 | 0.04367  | 0.02243 | 0.02243 | 0.0383  | 0.0383  | 0        | 0       | 0       | 0       | 0       |
| w5.females_IMM      | 0.00173 | 0.00173 | 0       | 0       | 0.00098  | 0.00098 | 0       | 0        | 0.00097 | 0.00097 | 0       | 0       | 0        | 0       | 0       | 0       | 0       |
| w5.males_IMM        | 0.00173 | 0.00173 | 0       | 0       | 0.00139  | 0.00139 | 0       | 0        | 0.00097 | 0.00097 | 0       | 0       | 0        | 0       | 0       | 0       | 0       |
| w5.females_MILARSHI | 0.00094 | 0.00094 | 0       | 0       | 0.00098  | 0.00098 | 0       | 0        | 0.00097 | 0.00097 | 0       | 0       | 0        | 0       | 0       | 0       | 0       |
| w5.males_MILARSHI   | 0.00094 | 0.00094 | 0       | 0       | 0.00139  | 0.00139 | 0       | 0        | 0.00097 | 0.00097 | 0       | 0       | 0        | 0       | 0       | 0       | 0       |
| w5.females_STOCKADE | 0.00065 | 0.00065 | 0       | 0       | 0.00098  | 0.00098 | 0       | 0        | 0.00097 | 0.00097 | 0       | 0       | 0        | 0       | 0       | 0       | 0       |
| w5.males_STOCKADE   | 0.00065 | 0.00065 | 0       | 0       | 0.00139  | 0.00139 | 0       | 0        | 0.00097 | 0.00097 | 0       | 0       | 0        | 0       | 0       | 0       | 0       |
| b4.females_IMM      | 0.29329 | 0.29329 | 0.34459 | 0.34461 | 0.35565  | 0.35565 | 0.39176 | 0.39175  | 0.36111 | 0.36111 | 0.40387 | 0.40384 | 0        | 0       | 0       | 0       | 0       |
| b4.males_IMM        | 0.29329 | 0.29329 | 0.34459 | 0.34461 | 0.34864  | 0.34856 | 0.44172 | 0.44169  | 0.36111 | 0.36111 | 0.40387 | 0.40384 | 0        | 0       | 0       | 0       | 0       |
| b4.females_MILARSHI | 0.87916 | 0.87905 | 0.96068 | 0.96074 | 0.35565  | 0.35565 | 0.39176 | 0.39175  | 0.36111 | 0.36111 | 0.40387 | 0.40384 | 0        | 0       | 0       | 0       | 0       |
| b4.males_MILARSHI   | 0.87916 | 0.87905 | 0.96068 | 0.96074 | 0.34864  | 0.34856 | 0.44172 | 0.44169  | 0.36111 | 0.36111 | 0.40387 | 0.40384 | 0        | 0       | 0       | 0       | 0       |
| b4.females_STOCKADE | 0.27566 | 0.27566 | 0.30857 | 0.30858 | 0.35565  | 0.35565 | 0.39176 | 0.39175  | 0.36111 | 0.36111 | 0.40387 | 0.40384 | 0        | 0       | 0       | 0       | 0       |
| b4.males_STOCKADE   | 0.27566 | 0.27566 | 0.30857 | 0.30858 | 0.34864  | 0.34856 | 0.44172 | 0.44169  | 0.36111 | 0.36111 | 0.40387 | 0.40384 | 0        | 0       | 0       | 0       | 0       |
| b5.females_IMM      | 0.03569 | 0       | 0       | 0.01912 | 0.01918  | 0       | 0       | 5.54E-05 | 0.02698 | 0       | 0       | 0.12071 | 0        | 0       | 0       | 0       | 0       |
| b5.males_IMM        | 0.03569 | 0       | 0       | 0.01912 | 5.89E-05 | 0       | 0       | 0.03663  | 0.02698 | 0       | 0       | 0.12071 | 0        | 0       | 0       | 0       | 0       |
| b5.females_MILARSHI | 0.00407 | 0       | 0       | 0.08014 | 0.01918  | 0       | 0       | 5.54E-05 | 0.02698 | 0       | 0       | 0.12071 | 0        | 0       | 0       | 0       | 0       |
| b5.males_MILARSHI   | 0.00407 | 0       | 0       | 0.08014 | 5.89E-05 | 0       | 0       | 0.03663  | 0.02698 | 0       | 0       | 0.12071 | 0        | 0       | 0       | 0       | 0       |
| b5.females_STOCKADE | 0.02193 | 0       | 0       | 0.01295 | 0.01918  | 0       | 0       | 5.54E-05 | 0.02698 | 0       | 0       | 0.12071 | 0        | 0       | 0       | 0       | 0       |
| b5.males_STOCKADE   | 0.02193 | 0       | 0       | 0.01295 | 5.89E-05 | 0       | 0       | 0.03663  | 0.02698 | 0       | 0       | 0.12071 | 0        | 0       | 0       | 0       | 0       |

Supplementary Table 3. Standard Errors associated to the estimates presented in Supplementary Table 2.

| Parameter           | mod1     | mod2     | mod3    | mod4    | mod5    | mod6    | mod7    | mod8    | mod9     | mod10    | mod11   | mod12   | mod13   | mod14    | mod15   | mod16   | mod17   |
|---------------------|----------|----------|---------|---------|---------|---------|---------|---------|----------|----------|---------|---------|---------|----------|---------|---------|---------|
| w1.females          | 0.00534  | 0.00556  | 0.00538 | 0.00566 | 0.00506 | 0.00617 | 0.00607 | 0.0062  | 0.00566  | 0.0051   | 0.00717 | 0.0044  | 0.00528 | 0.00432  | 0.00384 | 0       | 0       |
| w1.males            | 0.0075   | 0.00682  | 0.00624 | 0.00575 | 0.00646 | 0.00652 | 0.00606 | 0.00721 | 0.00722  | 0.00613  | 0.00591 | 0.00633 | 0.00574 | 0.00432  | 0.00384 | 0       | 0       |
| b1.females          | 0.02783  | 0.0291   | 0.03612 | 0.02627 | 0.02951 | 0.03329 | 0.02781 | 0.02843 | 0.02864  | 0.03308  | 0.0343  | 0.02397 | 0.03215 | 0.0174   | 0.03234 | 0       | 0       |
| b1.males            | 0.02379  | 0.01899  | 0.02268 | 0.02004 | 0.02538 | 0.0226  | 0.02312 | 0.02394 | 0.02703  | 0.02309  | 0.02216 | 0.0186  | 0.01877 | 0.0174   | 0.03234 | 0       | 0       |
| w2.females          | 0.00029  | 0.00032  | 0.00033 | 0.00036 | 0.00033 | 0.0003  | 0.0003  | 0.00031 | 0.0003   | 0.00028  | 0.00025 | 0.00027 | 0.00054 | 0.00051  | 0       | 0.00424 | 0       |
| w2.males            | 0.00049  | 0.00049  | 0.00065 | 0.00055 | 0.00092 | 0.0007  | 0.00077 | 0.00074 | 0.00073  | 0.00059  | 0.00064 | 0.00048 | 0.0011  | 0.00051  | 0       | 0.00424 | 0       |
| b2.females          | 0.00677  | 0.00782  | 0.00673 | 0.00733 | 0.0077  | 0.00762 | 0.00606 | 0.00622 | 0.00686  | 0.00678  | 0.0058  | 0.00631 | 0.00767 | 0.00538  | 0       | 0.04953 | 0       |
| b2.males            | 0.00468  | 0.00563  | 0.00595 | 0.00582 | 0.00834 | 0.00668 | 0.00804 | 0.00713 | 0.00728  | 0.00449  | 0.00609 | 0.00434 | 0.00798 | 0.00538  | 0       | 0.04953 | 0       |
| w3.females          | 0        | 0        | 0       | 0       | 0       | 0       | 0       | 0       | 0        | 0        | 0       | 0       | 0       | 0        | 0       | 0       | 0       |
| w3.males            | 0        | 0        | 0       | 0       | 0       | 0       | 0       | 0       | 0        | 0        | 0       | 0       | 0       | 0        | 0       | 0       | 0       |
| w3.2000             | 0.00155  | 0.00168  | 0.0017  | 0.00151 | 0.00124 | 0.00151 | 0.0016  | 0.00206 | 0.00154  | 0.00138  | 0.00193 | 0.00192 | 0.00149 | 0.00151  | 0.00367 | 0.00369 | 0.00216 |
| w3.1940             | 0.00358  | 0.00344  | 0.00389 | 0.00402 | 0.00353 | 0.00308 | 0.00397 | 0.00376 | 0.00325  | 0.00284  | 0.00397 | 0.00324 | 0.00392 | 0.00348  | 0.00429 | 0.00568 | 0.00424 |
| w3.1960             | 0        | 0        | 0       | 0       | 0       | 0       | 0       | 0       | 5.12E-20 | 0        | 0       | 0       | 0.00034 | 2.68E-05 | 0.00302 | 0.00244 | 0.00085 |
| w3.1980             | 0.00089  | 0.00106  | 0.00094 | 0.00103 | 0.00104 | 0.00112 | 0.0011  | 0.00082 | 0.00104  | 0.00087  | 0.00098 | 0.00088 | 0.00091 | 0.00102  | 0.00291 | 0.00348 | 0.00125 |
| w3.Unknown          | 0.00278  | 0.00244  | 0.00244 | 0.00244 | 0.00246 | 0.0024  | 0.0022  | 0.00194 | 0.00262  | 0.00296  | 0.00197 | 0.00231 | 0.00248 | 0.0025   | 0.0034  | 0.00276 | 0.00248 |
| w3.Ayeyarwa         | 0.00127  | 0.00198  | 0.00117 | 0.00092 | 0.00181 | 0.0011  | 0.00091 | 0.00099 | 0.00079  | 0.00158  | 0.00131 | 0.00139 | 0.00317 | 0.00373  | 0.00375 | 0.00374 | 0.00458 |
| w3.Bago             | 0.00039  | 0.00033  | 0.00089 | 0.00052 | 0.00046 | 0.00065 | 0.00096 | 0.00062 | 0.00059  | 0.00043  | 0.00052 | 0.00087 | 0.00196 | 0.00187  | 0.00363 | 0.00351 | 0.00208 |
| w3.Kachin           | 0.00168  | 0.00174  | 0.00143 | 0.0015  | 0.00159 | 0.00154 | 0.00161 | 0.0017  | 0.00159  | 0.00164  | 0.00119 | 0.00145 | 0.00206 | 0.00178  | 0.00321 | 0.00275 | 0.00186 |
| w3.Magway           | 0.00072  | 0.00069  | 0.00075 | 0.00044 | 0.00081 | 0.00023 | 0.00029 | 0.00056 | 0.00043  | 0.00048  | 0.00044 | 0.00064 | 0.00085 | 0.00071  | 0.003   | 0.00276 | 0.00114 |
| w3.Mandalay         | 0.00167  | 0.00162  | 0.00189 | 0.00166 | 0.00158 | 0.0016  | 0.00158 | 0.00167 | 0.00175  | 0.00158  | 0.00156 | 0.00217 | 0.00231 | 0.00203  | 0.00362 | 0.00312 | 0.0018  |
| w3.Rakhine          | 6.17E-05 | 8.95E-05 | 0.00054 | 0.00014 | 0.00031 | 0.00016 | 0.00042 | 0.0005  | 0.00019  | 9.37E-05 | 0.00056 | 0.00079 | 0.00147 | 0.00185  | 0.00432 | 0.00294 | 0.00256 |
| w3.Sagaing          | 0.0009   | 0.00095  | 0.00117 | 0.00108 | 0.00104 | 0.00114 | 0.00116 | 0.00093 | 0.00091  | 0.00129  | 0.00096 | 0.00094 | 0.00148 | 0.00155  | 0.0032  | 0.00246 | 0.00126 |
| w3.Shan             | 0.00268  | 0.00233  | 0.00167 | 0.00183 | 0.00186 | 0.00176 | 0.00191 | 0.0019  | 0.00175  | 0.00206  | 0.00201 | 0.0017  | 0.00191 | 0.00219  | 0.00374 | 0.00336 | 0.00243 |
| w3.Tanintha         | 0.00445  | 0.0049   | 0.00496 | 0.00526 | 0.00463 | 0.00484 | 0.00405 | 0.00439 | 0.00411  | 0.00459  | 0.00522 | 0.00557 | 0.00829 | 0.00528  | 0.00544 | 0.00654 | 0.00645 |
| w4.females_IMM      | 0.01346  | 0.01403  | 0.00847 | 0.00902 | 0.00967 | 0.00994 | 0.00532 | 0.00473 | 0.00836  | 0.01017  | 0.00557 | 0.00564 | 0       | 0        | 0       | 0       | 0       |
| w4.males_IMM        | 0.01346  | 0.01403  | 0.00847 | 0.00902 | 0.01992 | 0.01961 | 0.01017 | 0.01482 | 0.00836  | 0.01017  | 0.00557 | 0.00564 | 0       | 0        | 0       | 0       | 0       |
| w4.females_MILARSHI | 0.02344  | 0.02349  | 0.01883 | 0.02009 | 0.00967 | 0.00994 | 0.00532 | 0.00473 | 0.00836  | 0.01017  | 0.00557 | 0.00564 | 0       | 0        | 0       | 0       | 0       |
| w4.males_MILARSHI   | 0.02344  | 0.02349  | 0.01883 | 0.02009 | 0.01992 | 0.01961 | 0.01017 | 0.01482 | 0.00836  | 0.01017  | 0.00557 | 0.00564 | 0       | 0        | 0       | 0       | 0       |
| w4.females_STOCKADE | 0.01019  | 0.01195  | 0.00759 | 0.00939 | 0.00967 | 0.00994 | 0.00532 | 0.00473 | 0.00836  | 0.01017  | 0.00557 | 0.00564 | 0       | 0        | 0       | 0       | 0       |
| w4.males_STOCKADE   | 0.01019  | 0.01195  | 0.00759 | 0.00939 | 0.01992 | 0.01961 | 0.01017 | 0.01482 | 0.00836  | 0.01017  | 0.00557 | 0.00564 | 0       | 0        | 0       | 0       | 0       |
| w5.females_IMM      | 0.00069  | 0.00058  | 0       | 0       | 0.00049 | 0.00046 | 0       | 0       | 0.00045  | 0.00043  | 0       | 0       | 0       | 0        | 0       | 0       | 0       |
| w5.males_IMM        | 0.00069  | 0.00058  | 0       | 0       | 0.00084 | 0.00085 | 0       | 0       | 0.00045  | 0.00043  | 0       | 0       | 0       | 0        | 0       | 0       | 0       |
| w5.females_MILARSHI | 0.00121  | 0.00136  | 0       | 0       | 0.00049 | 0.00046 | 0       | 0       | 0.00045  | 0.00043  | 0       | 0       | 0       | 0        | 0       | 0       | 0       |
| w5.males_MILARSHI   | 0.00121  | 0.00136  | 0       | 0       | 0.00084 | 0.00085 | 0       | 0       | 0.00045  | 0.00043  | 0       | 0       | 0       | 0        | 0       | 0       | 0       |
| w5.females_STOCKADE | 0.00043  | 0.00045  | 0       | 0       | 0.00049 | 0.00046 | 0       | 0       | 0.00045  | 0.00043  | 0       | 0       | 0       | 0        | 0       | 0       | 0       |
| w5.males_STOCKADE   | 0.00043  | 0.00045  | 0       | 0       | 0.00084 | 0.00085 | 0       | 0       | 0.00045  | 0.00043  | 0       | 0       | 0       | 0        | 0       | 0       | 0       |
| b4.females_IMM      | 0.11172  | 0.14933  | 0.11071 | 0.12457 | 0.09858 | 0.1024  | 0.27209 | 0.09745 | 0.10638  | 0.10814  | 0.10136 | 0.15303 | 0       | 0        | 0       | 0       | 0       |
| b4.males_IMM        | 0.11172  | 0.14933  | 0.11071 | 0.12457 | 0.51964 | 0.39262 | 0.3534  | 0.56475 | 0.10638  | 0.10814  | 0.10136 | 0.15303 | 0       | 0        | 0       | 0       | 0       |
| b4.females_MILARSHI | 0.4359   | 0.66614  | 0.60732 | 0.69537 | 0.09858 | 0.1024  | 0.27209 | 0.09745 | 0.10638  | 0.10814  | 0.10136 | 0.15303 | 0       | 0        | 0       | 0       | 0       |
| b4.males_MILARSHI   | 0.4359   | 0.66614  | 0.60732 | 0.69537 | 0.51964 | 0.39262 | 0.3534  | 0.56475 | 0.10638  | 0.10814  | 0.10136 | 0.15303 | 0       | 0        | 0       | 0       | 0       |
| b4.females_STOCKADE | 0.24598  | 0.37622  | 0.33929 | 0.29059 | 0.09858 | 0.1024  | 0.27209 | 0.09745 | 0.10638  | 0.10814  | 0.10136 | 0.15303 | 0       | 0        | 0       | 0       | 0       |
| b4.males_STOCKADE   | 0.24598  | 0.37622  | 0.33929 | 0.29059 | 0.51964 | 0.39262 | 0.3534  | 0.56475 | 0.10638  | 0.10814  | 0.10136 | 0.15303 | 0       | 0        | 0       | 0       | 0       |
| b5.females_IMM      | 0.02217  | 0        | 0       | 0.03981 | 0.02013 | 0       | 0       | 0.02043 | 0.11333  | 0        | 0       | 0.13264 | 0       | 0        | 0       | 0       | 0       |
| b5.males_IMM        | 0.02217  | 0        | 0       | 0.03981 | 0.16065 | 0       | 0       | 0.13294 | 0.11333  | 0        | 0       | 0.13264 | 0       | 0        | 0       | 0       | 0       |
| b5.females_MILARSHI | 0.02356  | 0        | 0       | 0.04959 | 0.02013 | 0       | 0       | 0.02043 | 0.11333  | 0        | 0       | 0.13264 | 0       | 0        | 0       | 0       | 0       |
| b5.males_MILARSHI   | 0.02356  | 0        | 0       | 0.04959 | 0.16065 | 0       | 0       | 0.13294 | 0.11333  | 0        | 0       | 0.13264 | 0       | 0        | 0       | 0       | 0       |
| b5.females_STOCKADE | 0.08319  | 0        | 0       | 0.12526 | 0.02013 | 0       | 0       | 0.02043 | 0.11333  | 0        | 0       | 0.13264 | 0       | 0        | 0       | 0       | 0       |
| b5.males_STOCKADE   | 0.08319  | 0        | 0       | 0.12526 | 0.16065 | 0       | 0       | 0.13294 | 0.11333  | 0        | 0       | 0.13264 | 0       | 0        | 0       | 0       | 0       |

Supplementary Table 4. Predicted median lifespans across capture conditions and sexes. All predictions were predicted for individuals living in the most optimal condition encountered in the sample (i.e. from the region Magway and the birth cohort 1960).

| <b>Capture status</b>      | <b>Age at capture (yrs)</b> | <b>Males</b> | <b>Females</b> |
|----------------------------|-----------------------------|--------------|----------------|
| Captive born               |                             | 30.81        | 44.73          |
| Captured by stockade       | 5                           | 24.84        | 41.18          |
|                            | 20                          | 24.02        | 39.48          |
| Captured by immobilisation | 5                           | 24.51        | 40.99          |
|                            | 20                          | 23.34        | 38.47          |
| Captured by milarshi       | 5                           | 25.55        | 41.56          |
|                            | 20                          | 24.03        | 40.37          |
